# Supplementary material for: COVID-19 Vaccination Experiences in Social Circles Influence Preferences for COVID-19 Vaccine Mandates: An Online Survey of the United States Population
Source: Preprints.org preprint supplement (doi:10.20944/preprints202401.1470.v1), 2024-01-19
Supplement: Supplementary file 1 [file supplementary]

**Supplemental Material**

**Supplementary Material 1: National Survey of Covid Health Experiences**

| **NATIONAL SURVEY OF COVID-19 HEALTH EXPERIENCES  Online Survey Consent Information**   **Purpose of Research.**  You are being asked to participate in this web-based survey in order to increase our understanding of the health experiences people have had during the COVID-19 crisis period.  **What You Will Do.** If you choose to participate in this research study, you will complete a 10-20 minute survey regarding your experiences during the COVID-19 crisis. You will only take this one survey.   **Participation and Withdrawal.** Your participation in this research is voluntary. You have the right to refuse to participate in this survey. You may withdraw from the web-based survey in this research study at any time.   **Confidentiality.** Any information that is obtained in connection with this study and that can be identified with you will remain confidential and will be disclosed only with your permission or as required by law. When the results of the research are published or discussed at conferences, no information will be included that reveals your identity. Your privacy will be protected to the maximum extent allowable by law.   **Potential Benefits.** The information that you provide in the surveys will help us better understand challenges people have faced during the crisis and will be used to improve pandemic responses in the future.   **Potential Risks.** Remember that only the research project team will know what you have said. Results will be shared in aggregate form only without identifying who said what. The risks are therefore minimal.   **Costs and Compensation for Being in the Study.** You will not incur any expenses for participating in the survey, beyond your time, assuming you have internet access. You are eligible to receive compensation for participating in the survey as defined by Survey Sampling International.   **Contact Information for Questions or Concerns.** If you have concerns or questions about this study, such as scientific issues, how to do any part of it, or to report an injury, please contact the lead researcher: Mark Skidmore, 91 Justin S. Morrill Hall of Agriculture, Michigan State University, East Lansing, MI 48824, email mskidmor@msu.edu, tel. 517-353-9172.   If you have questions or concerns about your role and rights as a research participant, would like to obtain information or offer input, or would like to register a complaint about this study, you may contact, anonymously if you wish, the Michigan State University’s Human Research Protection Program at: 517-355-2180, Fax 517-432-4503, or e-mail irb@msu.edu or regular mail at 202 Olds Hall, MSU, East Lansing, MI 48824.   **After reading the above, please indicate if you consent to participate. Selecting "I Consent" indicates you are willing to participate. Selecting "I Do Not Consent" indicates you are NOT willing to participate.**   - I Consent. (1) - I Do Not Consent. (2)   Skip To: Q2 If NATIONAL SURVEY OF COVID-19 HEALTH EXPERIENCES Online Survey Consent Information Purpose of Rese... = I Consent.  Skip To: End of Survey If NATIONAL SURVEY OF COVID-19 HEALTH EXPERIENCES Online Survey Consent Information Purpose of Rese... = I Do Not Consent.  In the following portion of the survey, you will be asked about your health experiences during the COVID-19 crisis.  Q1 Have you had COVID-19?   - No. (1) - Yes. (2)   Skip To: Q2 If Have you had COVID-19? = Yes.  Skip To: Q10 If Have you had COVID-19? = No.  Q2 Please indicate how you were diagnosed. (check all that apply)   - PCR Test (1) - Rapid Test (2) - COVID-19 Symptoms (3)   Q3 About when were you sick.  ________________________________________________________________  Q4 About how long did it take for you to recover?   - Less than a week. (1) - Less than two weeks. (2) - Less than three weeks. (3) - Four weeks or more. (indicate the number of weeks) (4) ________________________________________________   Q5 Do you have any lingering health issues in the wake of your COVID-19 infection?   - No. (1) - Yes. (please describe below) (2) ________________________________________________   Q6 Did you use any medications as treatment for COVID-19?   - No (1) - Yes. (please list medications below) (2) ________________________________________________   Q7 Did you use alternative medications such as ivermectin or hydroxychloroquine as treatment for COVID-19?   - No. (1) - Yes. (2)   Skip To: Q10 If Did you use alternative medications such as ivermectin or hydroxychloroquine as treatment for COV... = No.  Skip To: Q8 If Did you use alternative medications such as ivermectin or hydroxychloroquine as treatment for COV... = Yes.  Q8 Which of the following alternative treatments did you use?   - Ivermectin (1) - Hydroxychloroquine (2) - Other (please describe below) (3) ________________________________________________   Q9 In your assessment, did the alternative medication you took help you recover?   - No. (1) - Yes. (2)   Q10 Which of the following statements best describes your view of alternative COVID-19 treatments such as ivermectin or hydroxychloroquine?   - Research has shown these treatments to be ineffective for COVID-19. (1) - Research has shown these treatments to be effective for COVID-19. (2) - I know little about the effectiveness of these treatments for COVID-19. (3)   In the following portion of the survey, you will be asked about your experiences with COVID-19 inoculation.  Q11 Have you been inoculated against COVID-19?   - No. (1) - Yes. (2)   Skip To: Q18 If Have you been inoculated against COVID-19? = No.  Skip To: Q12 If Have you been inoculated against COVID-19? = Yes.  Q12 Did your COVID-19 infection occur before or after inoculation?   - Before. (1) - After. (2) - I have not had COVID-19. (3)   Q13 Which of the three authorized vaccines did you use? (check all that apply)   |  | 1st Dose (1) | 2nd Dose (2) | 3rd Dose (3) | | --- | --- | --- | --- | | Pfizer. (1) |  |  |  | | Moderna. (2) |  |  |  | | Johnson & Johnson. (3) |  |  |  | | I do not remember. (4) |  |  |  |   Q14 Have you experienced any health problems since you were vaccinated?   - No. (1) - Yes. (Please describe below) (2) ________________________________________________   Skip To: Q18 If Have you experienced any health problems since you were vaccinated? = No.  Skip To: Q15 If Have you experienced any health problems since you were vaccinated? = Yes. (Please describe below)  Q15 What is the timeframe of your post vaccination health problems? (check all that apply)   |  | 0-3 Days (1) | 4-30 Days (2) | 30+ Days (3) | | --- | --- | --- | --- | | Dose 1 (1) |  |  |  | | Dose 2 (2) |  |  |  | | Dose 3 (3) |  |  |  |   Q16 Was the health condition reported to a doctor?   - No. (1) - Yes. (2)   Skip To: Q18 If Was the health condition reported to a doctor? = No.  Skip To: Q17 If Was the health condition reported to a doctor? = Yes.  Q17 Was the health event reported by your doctor to the CDC Adverse Event Reporting System as a possible adverse event from vaccination?   - No. (1) - Yes. (2) - I do not know. (3)   In the following portion of the survey, you will be asked about the health experiences of those in your social circles.  Q18 Has anyone in your social circles (family, friends, church, work colleagues, social networks, etc.) experienced a significant health problem after they had been ill from COVID-19 (but not from the vaccine)?   - No. (1) - Yes. (2)   Skip To: Q22 If Has anyone in your social circles (family, friends, church, work colleagues, social networks, etc... = No.  Skip To: Q19 If Has anyone in your social circles (family, friends, church, work colleagues, social networks, etc... = Yes.  Q19 Did just one person have this problem or more than one?   - One. (1) - Two. (2) - Three. (3) - More than three (please indicate how many below) (4) ________________________________________________   Q20 Of the people you know who experienced a health problem after being sick from COVID-19 (but not from the vaccine), think about the one you know BEST. Please describe the health condition experienced by that person.  ________________________________________________________________  ________________________________________________________________  ________________________________________________________________  ________________________________________________________________  Q21 About how old is the person who experienced this health condition?   - Under 18 years. (1) - 18 to 24 years. (2) - 25 to 29 years. (3) - 30 to 34 years. (4) - 35 to 39 years. (5) - 40 to 44 years. (6) - 45 to 49 years. (7) - 50 to 54 years. (8) - 55 to 59 years. (9) - 60 to 64 years. (10) - 65 to 69 years. (11) - 70 to 74 years. (12) - 75 to 79 years. (13) - 80 to 84 years. (14) - 85 to 89 years. (15) - 90 years or over. (16)   Q22 Has anyone in your social circles (family, friends, church, work colleagues, social networks, etc.) experienced a significant health problem after they received the COVID-19 vaccination?   - No. (1) - Yes. (2)   Skip To: Q26 If Has anyone in your social circles (family, friends, church, work colleagues, social networks, etc... = No.  Skip To: Q23 If Has anyone in your social circles (family, friends, church, work colleagues, social networks, etc... = Yes.  Q23 Did just one person have this problem or more than one?   - One. (1) - Two. (2) - Three. (3) - More than three. (please indicate how many below) (4) ________________________________________________   Q24 Of the people you know who experienced a health problem after being vaccinated, think about the one you know BEST. Please describe the health condition experienced by that person.  ________________________________________________________________  ________________________________________________________________  ________________________________________________________________  ________________________________________________________________  ________________________________________________________________  Q25 About how old is the person who experienced this health condition?   - Under 18 years. (1) - 18 to 24 years. (2) - 25 to 29 years. (3) - 30 to 34 years. (4) - 35 to 39 years. (5) - 40 to 44 years. (6) - 45 to 49 years. (7) - 50 to 54 years. (8) - 55 to 59 years. (9) - 60 to 64 years. (10) - 65 to 69 years. (11) - 70 to 74 years. (12) - 75 to 79 years. (13) - 80 to 84 years. (14) - 85 to 89 years. (15) - 90 years or over. (16)   In this last portion of the survey, you will be asked for demographic information and your opinion on several COVID-19 policies.  Q26 What is your age?   - 18 to 24 years. (1) - 25 to 29 years. (2) - 30 to 34 years. (3) - 35 to 39 years. (4) - 40 to 44 years. (5) - 45 to 49 years. (6) - 50 to 54 years. (7) - 55 to 59 years. (8) - 60 to 64 years. (9) - 65 to 69 years. (10) - 70 to 74 years. (11) - 75 to 79 years. (12) - 80 to 84 years. (13) - 85 to 89 years. (14) - 90 years or over. (15)   Q27 What is the highest level of education you have completed?   - Less than High School. (1) - High School / GED. (2) - Some College. (3) - 2-year College Degree. (4) - 4-year College Degree. (5) - Master’s Degree. (6) - Doctoral Degree. (7) - Professional Degree. (JD, MD) (8)   Q28 What is your race?   - White/Caucasian. (1) - African American. (2) - Hispanic. (3) - Asian. (4) - Native American. (5) - Pacific Islander. (6) - Other/more than one. (7)  |  |  | | --- | --- |   Q29 Please indicate your gender below.  ________________________________________________________________  Q30 Which type of community do you live in?   - Urban. (1) - Suburban. (2) - Rural. (3)   Q31 What is your combined annual household income?   - Less than $10,000. (1) - $10,000 - $14,999. (2) - $15,000 - $19,999. (3) - $20,000 - $24,999. (4) - $25,000 - $34,999. (5) - $35,000 - $49,999. (6) - $50,000 - $74,999. (7) - $75,000 - $99,999. (8) - $100,000 - $149,999. (9) - $150,000 - $199,999. (10) - $200,000 or more. (11)   Q32 Think about your social circles (family, friends, church, work colleagues, social networks, etc.). About how many people in your circles do you know well enough that you would typically learn about a significant emerging health condition? (numerical answer only please)  ________________________________________________________________  Q33 Please indicate your level of agreement/disagreement with the following statement: Vaccine mandates should be implemented across the nation.   - Strongly Agree. (1) - Agree. (2) - Neutral. (3) - Disagree. (4) - Strongly Disagree. (5)   Q34 Please indicate your level of agreement/disagreement with the following statement: Digital health/vaccine passports should be used to track COVID-19 vaccine status and enforce vaccine mandates.   - Strongly Agree. (1) - Agree. (2) - Neutral. (3) - Disagree. (4) - Strongly Disagree. (5)   Q35 Please indicate the reason(s) many policymakers may want to implement a digital vaccine passport system. (check all that apply)   - Systematically Monitor Vaccine Status. (1) - Enforce Vaccine Mandates. (6) - Facilitate the Adoption of a Digital Currency. (2) - Control Purchases. (3) - Control Assets. (4) - Control Movement. (5)   Q36 Please indicate your level of agreement/disagreement with the following statement: Lockdowns are an effective policy tool for reducing COVID-19 transmission.   - Strongly Agree. (1) - Agree. (2) - Neutral. (3) - Disagree. (4) - Strongly Disagree. (5)   Q37 Please indicate your level of agreement/disagreement with the following statement: Mask mandates are an effective policy tool for reducing COVID-19 transmission.   - Strongly Agree. (1) - Agree. (2) - Neutral. (3) - Disagree. (4) - Strongly Disagree. (5)   Q38 Please indicate where you obtain news and information about COVID-19. (check all that apply)   - Mainstream News Sources. (1) - Alternative News Sources. (2) - Peer Reviewed Scientific Literature. (3) - Official Gov’t Sources Such as the U.S. Center for Disease Control (CDC). (4) - Other (please provide information below). (5) ________________________________________________   Q39 Please indicate your political affiliation.   - Democrat. (1) - Republican. (2) - Independent. (3) - Other. (please indicate affiliation below) (4) ________________________________________________   Q40 Please provide your five-digit zip code. |
| --- | --- | --- | --- | --- | --- | --- | --- | --- | --- | --- | --- | --- | --- | --- | --- | --- | --- | --- | --- | --- | --- | --- | --- | --- | --- | --- | --- | --- | --- | --- | --- | --- | --- | --- | --- | --- | --- | --- |

**Supplementary Material 2: Reported COVID-19 Deaths and Injuries in Social Circles**


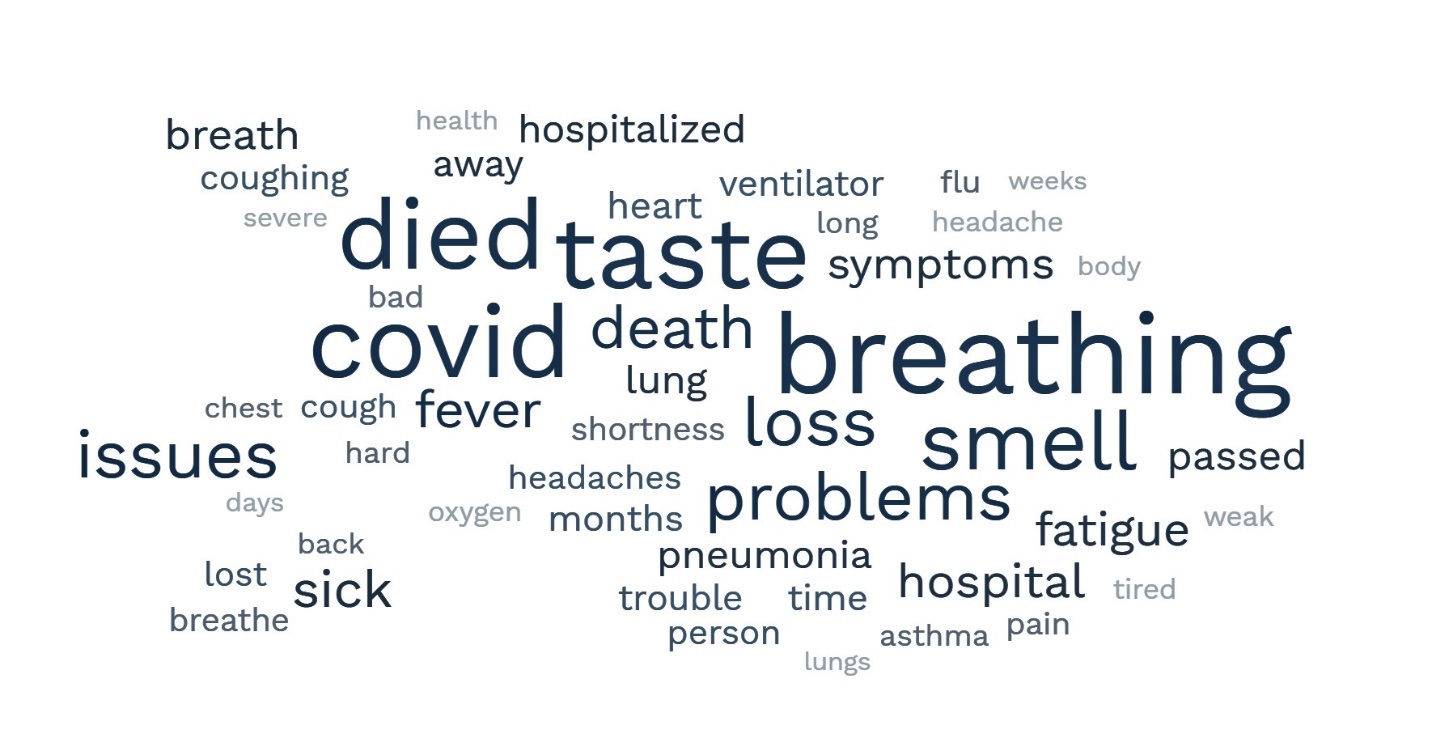


**Comments Provided by Respondents for the Following Question: Of the people you know who experienced a health problem after being sick from COVID-19 (but not from the vaccine), think about the one you know BEST. Please describe the health condition experienced by that person.**

**These comments are intended to be provided as a separate linked document in the final published article.**

Could not talk

Fever, body aches, can't taste food, can't smell anything

Weakness and pain

Lost their taste and smell

Still kept a cough, Smell and taste problems. Strength never quite returned to their normal

They were hospitalized for 2 months. His wife died from Covid. He continues to be tired and his lungs are scarred. He continues therapy but chooses to work (self-employed dump truck driver).

Hospitalization, ventilator, then died after 2 weeks in hospital

Died

Shortness of breath, lethargy.

Respiratory problems

My brother and since he had covid he can't get his diabetes back under control

Pneumonia - general malaise

He died

Breathing

Severe sinus infection

ICU my brother very ill

They died from covid

Felt sickly for 2 days and then could not get out of bed. Called ambulance. Three days later after being on ventilator. They died.

They passed away.

Organs shut down proceeded by death

Ex-husband passed away

Respiratory problems, weakness, hospitalization.

Died from Covid

Hospitalization

Headache, cough, achy, loss of taste and smell, sneezing

They both died.

Person experienced extreme weight loss and still appears frail.

She died right after she contracted it. Don't know what the health issue was.

My son is having issues like mine. Insomnia, constant headaches, body aches, some confusion. He has a worse time concentrating.

She got very sick and suffered for a long time before she died.

Long haul covid effects. Still no taste or smell. Increasing problems with memory. Body aches and pains. These symptoms are all new since the virus.

Death

Respiratory problems, elevated temp, lethargy, listlessness, blurred vision

They had to be hospitalized

Kidneys are now giving her problems and she may need dialysis in the future.

They felt like ran over by a train, no endurance

Son in law had fever nausea and breathing problems. Lost smell and taste

The pastor but I have been watching online only. I have not been exposed

COVID

Loss of taste and smell

My son all covid symptoms

Fever, headache, and fatigue

Trouble breathing & chest pains

My grandmother suffered from breathing problems upon her infection and ultimately died from COVID.

Pneumonia

Death

Shingles

They made it through

They passed away from it

Parkinson’s

Had to get rushed to the hospital, very ill and weak

Major breathing problems for which she was hospitalized

Extremely high fever after 2nd shot.

Side effects after covid. Wasn't able to recover from his chronic diseases.

Difficulty breathing

He is currently in the ICU on a ventilator due to low oxygen saturation, and he has had a stroke.

Heart issues

Edema, liver issues, swollen legs, could not sleep for days

Breathing

Stroke

Was in the hospital for 1+ months. Six months later, still unable to walk more than 100 feet at a time

death

Hospital with shortness of breath

Could not breath could walk felt fatigue hair lose vision lost organ damage insomnia

They died

Our daughter had flu like systems but fortunately it got no worse than that.

difficulty breathing

She ended up dying from COVID 19, she was my youngest sister.

Margie died from COVID-19 complications.

Shortness of breath, soreness, body pain

Light headedness memory loss

Relatives had it

Hospitalized. Intubated, died

Killed him supposedly but he had underlying severe conditions

My wife's grandfather passed away from COVID pneumonia in the early stages of the pandemic

Died

This person was in the mid-30s non-vaccinated and have past cancer problems.

Loss of breath

Loss of taste/smell

They got vaccine and ended up getting delta variant and was hospitalized for a week.

Severe breathing problems. Unfortunately, he didn't recover from it. It was my brother-in-law & he caught it while in a assisted living facility.

Still not 100%, Less stamina

No smelling or tasting

Trouble breathing

Loss of taste and smell but other symptoms were minor, much like a mild cold

In hospital for 3 months under oxygen all the time

Unusual heartbeat

Fever, loss of appetite, hospitalization, and finally death.

Contract covid then pneumonia and passed away

diabetes

Lost energy and hand shaken

One suffered fatigue more than usual

Death

They still can't taste anything

They were in a coma. They are now out of the hospital and recovering. Doing therapy.

Lingering covid symptoms

No taste

They are deaf in one ear and can’t hear out of it from COVID-19

Put on a ventilator. Kidney issues. Very sick for a long time.

Breathing issues

They were bed ridden for 3 days after the second dose of the vaccine

Breathing issues

Hospitalized

Loss of taste for months

Felt weak for days and weeks after and shortness of breath could not walk far an felt very drained for weeks did not have no strength to even get up and walk to the bathroom it was very hard to get back to yourself.

He was already sick then he got COVID and died a month later it was my uncle

Strong flu-like symptoms, loss of smell and taste

My wife was sick for 3 or 4 days with it bad, my 8-year old son barely felt it for 24 hours

Trouble breathing, hospitalized

They have a headache and sore throat

Ongoing breathing problems

Covid. Bad health.

Breathing issues

Shortness of breath - still going on five months after positive test.

One of my classmates in the other classes got sick because of Covid, I think it was from his community.

Died from covid complications

Death

They were very sick and could barely do anything

Died

Severe cough and breathing problems. Also, some stomach issues

Chronic asthma, chronic tiredness and weakened immune system.

Fatigue

They died from COVID

Niece asthma and was very sick for over a week. Had antibodies treatment 2nd time

Had to go to the hospital

Serious breathing issues. Hospitalized in ICU.

Loss of hair, weak, loss of memory

They had a stuffed nose coughing and voice lost

Some people in my church died from covid 19. I'm not sure how many but more than three. I did not know them well.

Their COPD got worse.

They did not have their sense of smell for months.

Loss of appetite lung capacity decreased

He was hospitalized then died

Not being able to taste

Hair loss, weight loss, digestion issues

Weakness fatigue nauseous where the worst symptoms

Had a blood clot that led to death

They were all vaccinated but somehow got the covid. It’s like regular flu

Loss of taste and smell, extreme fatigue and stomachache

Chest pain

Chest pain

Extreme fatigue. No taste or smell

On oxygen

Diabetes asthma

Cancer

They are healthy and have no health issues

No taste or smell

They got autism

All the symptoms, headaches, barely could breathe

Coughing sleeping a lot throwing up and headaches

Fatigue

Substantial lung damage

High fever, lasting symptoms

She was diabetic & unfortunately passed away because of covid

Lung problems after having covid

Ongoing breathing issues, unable to perform to the same degree as prior.

Coughing

Fatigue, aches

death

They died

They died.

fever

Nauseated dizziness bad headache headaches rash a few others

They were just tired and worn out

One has memory problems, one lost lung function she passed away eventually

Worsened COPD

Their forces were low. They lost muscle and some air they had to be rushed to the hospital.

They became weak, lost some senses, and deals with lung issues.

Memory loss

Labored breathing

They took the Covid 19 shot and got Covid 19. Ended up in the hospital and put on remdesivir and ventilator then passed away. The hospitals are killing people with these treatments.

They were very tired and other bad symptoms

Young priest at church ended up in hospital on a ventilator. He recovered, but it took a while. His age group hadn't yet been eligible for a vaccine.

Shortness of breath

The person had trouble breathing and not having any energy to do everyday tasks.

Severe shortness of breath and poor exercise tolerance for 6+months following illness.

They are still on oxygen four weeks after

They died

Had to be quarantined and they felt miserable

Fever and lung problems

Yes, a rapid heartbeat

Extended hospitalization

She had almost bedridden for six months. Het fatigue is causing serious family issues.

Respiratory.

Near lung failure.

Hospitalized, on ventilator, then died.

Lung collapse

Hard to breathe, resulting in death

Headaches

Thought they were going to die. Couldn't breathe. Smell this or taste

Fatigue

Very sick for a long time, then very tired after

A niece had some symptoms of MS

Pneumonia, blood clots, death

Fatigue and hard time breathing

Tiredness

The entire family died except one died, six in total

Low energy and trouble breathing

Had to use oxygen machine now

This man in his 60’s developed Alzheimer’s. He has been health conscious his whole adult life, eating right and exercising regularly. He was completely healthy before Covid but has declined dramatically since.

Fatigue

Arithmetic heart problems

Trouble breathing low stamina and loss of weight

Heart congestion

This person had a fever every single day, brain fog, challenges with leg pain, headaches, weight gain, swelling and lots of other issues.

My grandmother she got put on the ventilator machine.

Trouble breathing

Lungs have weakened, now has to use an inhaler

They died

Breathing problems- needing oxygen constantly

Death from covid.

Severely short of breath and late onset asthma

Body aches, extreme fatigue

The person died

Couldn't smell or taste

My partner has COPD and she experienced much more severe reaction to the Covid

My son had COVID-19, He was very congested and had a fever.

They died

Several comorbidities, he got covid after driving to Florida. Admitted to Tampa VA hospital and received multiple breathing treatments. He had DM, CHF, Pacemaker in addition to the fully vac/boosted break through case he acquired.

Trouble breathing loss of taste and smell

Long term tiredness. No energy. Long term loss of smell and taste

Coughing

The person was an older man (69 years old), he was diagnosed with covid 19 on a Saturday and died on the following Wednesday.

Lung problems

Indefinitely shortness of breath at times when doing some physical demanding moves.

Flu like conditions

Covid pneumonia

She had memory and health problems.

Heavy breathing sore throat and sleep a lot

Loss of taste and smell. Throwing up, loss of weight, lethargic

My dad was in the hospital with it, couldn’t breathe

Death

Endless fatigue, diarrhea, and headache.

They were a very healthy person but since Covid started they've been hospitalized umpteen times.

Loss of taste, fever, run down feeling

Breathing issues and smell

Feeling tired and having huge headaches

He died

Flu like symptoms

Fever breathing difficult

Diminished lung capacity. Got pneumonia months later

Consistently tired

Person became very sick then died from complications

They have had chronic shortness of breath

Passed away

Bad Coughs

Worsened COPD

He got COVID & was hospitalized & passed away.

They experienced symptoms for over two weeks. They still currently cannot smell correctly after having covid.

Backaches and headaches

Cough and fatigue

Hard of breathing

Uncle was in remission from cancer, caught Covid from his son and died.

Unable to taste

Asthma complications

They died

Flu-like symptoms

It killed my grandmother

Blood clot

Loss of smell and taste

Serious COVID hospitalized and intubated but recovered with lasting problems

Loss of hair

They were coughing a lot, didn’t have any taste buds.

Pneumonia. Loss of smell and taste. Cough

Blood clots

Hard to get air

My dad. He had covid and said it was the worst thing ever

They had every symptom for Covid

Flu

Hospital for almost 2 months. He then had to go to rehab. The person was not diagnosed with any health issue before getting covid. The person’s breathing, kidneys, and heart were all affected. Every day was a struggle. It took 2 1/2 months to finally be discharged. Thankfully he is ok. Just frequent visits to heart and kidney doctors

Fatigue, trouble breathing

Pneumonia

Lung damage. Gets winded easily

On ventilator

They were having headaches and getting real sick

Reactivation of their lime disease

Their nose would not quit bleeding, so he was sent to the burn unit in Houston for pain medication

Trouble breathing

I really don’t know coughing issues and vomit

They were very weak they didn’t want to get out of bed, they could barely breathe, headaches were painful as if it were migraines, time they woke up he would fall back to sleep for hours. Couldn’t get out of bed

They were isolated and were coughing n sneezing

Respiratory problem, pneumonia

Brother-in-law hospitalized and quarantined

Unable to give the full scope do the after getting sick the isolation who is done

Dizziness

Flu like symptoms with vomiting.

My immune system is all messed up

He became ill; had a hard time breathing went to the hospital died a couple days later

They were throwing up and coughing a lot

COVID was really bad about

Hospital stay required a pacemaker and traq

They were sick for quite a while

This is very bad

Couldn’t taste or smell

Death

Can’t taste

Loss of taste

Bad headache

Mild, flu like illness

Covid

taste, ache, fever, etc - but bad enough to go to the hospital

Died

Thumping of the ears and sharp pain shooting through the ears

They passed away from pneumonia

The individual had experienced a stroke from diabetes after having covid and before having covid their diabetes was under control. It immediately was much worse.

Cousin 47- stroke Cousin 28- blood clots Aunt 63- death Friend 41- death

Breathing/lung issues even after covid

Sob

Shortness of breath. Breathing machine. Loss of weight and appetite. Weakness, had to have therapy to get strength back. Hospital for 2 months

Hard to breathe. No taste. Very very tired

Death

My cousin had COVID a year ago and she still has vertigo and headaches she can't work yet.

Still have problems with her stamina working with day-to-day activities.

Fatigue

Permanent heart and lung damage

Loss of smell and taste for almost a year now

Death

They died

Hard breathing, couldn’t talk, sweaty, chest hurt

Hair loss

Lung related issues

Breathing problem

Respiratory distress, life support, stroke

Ringing in ears

Died of heart attack

My sister-in-law died from it and two other people

Poor

They both died from it

Breathing problems

After COVID my family had chest pain

ICU and placed on ventilator

They get sudden dizzy spells.

More joint pains

Death

Death

Loss of taste and smell for months

Headache and cough

Dizziness, fever, fatigue

They will forever be changed. Cannot breathe. Wore them down. Still can’t smell.

Cold, cough, loss of taste and smell

They've been in the hospital 6 months on and off the ventilator

Death

Their COPD became and is still more severe. It’s been a year and half since she had it.

My pastor had a hard time breathing and was losing his stamina, but he survived.

No taste

Kidney failure

He was hospitalized for several days. The complication that arose was pneumonia.

Issues with their heart

My aunt was diagnosed with covid in March of 2020 and died from complications after 6 days

My brother became Type II diabetic after Covid.

Continued issues with their respiratory function

My sisters both

Fever, cough

General flu symptoms and lack of taste

Increased heart rate, fatigue, vertigo

Oxygen now

Loss of taste and smell for months.

Breathing issues. Sweating.

Breathing problems

Had to be admitted to ICU and put on ventilator

Developed pneumonia and passed away

Breathing issues

2 recovered and 1 died

Death

They had the same symptoms but got better more quickly.

Home sick in bed for a week. Lost taste and smell for over 6 months

Death

My uncle had two strokes from being exposed to it

Fever

My mother

They ended up recovering

Death

Just a weak immune system

Mental health and female issues

He was hospitalized with low oxygen levels

Stroke

Malnutrition

Loss of taste and cough mainly

Poor

Was elderly and in poor health. Could not recover once Covid was contracted. They passed.

They got very weak and out of control but got better thanks to God

Death

Pneumonia and breathing problems

Diabetes

Loss of taste and smell

Severe breathing issues

Joint issues

Loss of taste and fatigue

Breathing problem causing death

Heart issues developed

Friend’s wife. He said she ended up in the hospital. Turned blue and stopped breathing for a bit. They had to resuscitate her back. That’s all that I know.

Blood clot to heart, died but resuscitated, now has leg problems and must wear braces to walk, plus not real strong like before.

They died of covid

Covid

Traumatized

My uncle had to go on the breathing machine

Chronic back pain

Scars on lungs which cause breathing problems

Asthma developed afterwards, wheezing coughs

They are still having up and down fevers up to 100.7 and harder to breath than usual.

It was bad

They were older and seemed to have a weaker immune system. She was vomiting and couldn’t get out of bed. She constantly had a fever and slept through the days.

She had a runny nose couldn’t taste or smell much. She was in my household but wearing a mask really helped me out from not getting COVID

My sister died 2020 from covid in Florida. My niece was a police officer and she just died Oct 2021 covid. Her one-year old daughter was found next to her body

Sore muscles, difficult with memory

Loss of life during hospitalization due to being infected by a person who WAS inoculated

I don't really know she works at the store that I go in everyday and one day she wasn't there, and the owner said yeah she got sick with covid and a few days later we were going to her funeral is really sad.

Trouble breathing

Hair lost. Shortness of breath

Couldn't smell

She's always tired now. Some problems breathing.

Hard breathing

Died

Very tired

High blood pressure

They passed away

It was horrible vomiting I had my period

Death

Went to the hospital and died

He refused to get vaccinated and died at 73

Dementia worse

Trouble breathing

Death

Coughing

They died

Long haul covid symptoms

Compromised

High fever and chills

Not being able to breathe

Hospital and ventilator

Loss of taste or smell

My cousin died

VERY SICK AND PASSED AWAY

Difficulty breathing, loss of smell and taste! Very weak

Very bad

They never returned to normal after covid. He killed himself

Body pain

He still has a lingering cough, frequent chest and ribcage pain. Exhaustion. Muscle and joint aches.

Difficulties with breathing

That person died.

She died a year ago due to severe lung problems caused by Covid. The vaccines had not been approved at the time of her death.

My wife got it way worse than me

Pulmonary issues

Yes, he couldn’t breathe barely and smell

Long hauler

Hair loss, and taste

My sister-in-law has NEVER regained her sense of smell.

My brother had hard time breathing correctly after getting sick from COVID-19 but nothing much else

Got sick and did not recover

Frequent headaches, shortness of breath

They got very sick and weak. It was horrible they were sick for a long time.

Breathing problems… Loss of taste.

This person passed away

My niece had covid and now has problems with an enlarged heart.

Bad head pain, high temperature

They were sick

People that got problem need to be in the hospital

They lost all taste. Physically exhausted. They had a hard time breathing. And a hard time thinking. They said they were affected by a mental fog.

Their heath condition was really bad

They have long term covid symptoms no energy and coughing

Coma

Scary

He can't see his family for week

Fatigue

Energy, just don't seem to bounce back from covid, issues with eyes headaches

Headaches

Ongoing respiratory problems

Inability to stand for length of time

Flu

Died

Very bad and sick

Very lethargic and distressed.

Really sick

Not wanting to do anything

Heavy breathing

Died

Covid increased the affect and worsened her pneumonia

They died

They experienced illness after getting the vaccination…not after Covid

Continuing loss of taste and smell

Real sick

Her taste not come back

Body aches no sense. of smell or taste

Still lost of taste smell…weight loss, brain damage, etc.

Coughing sweaty fatigue and diarrhea

Had breathing problems

Loss of hair

Death

Death

Death

Flu like symptoms

Weak & shortness of breath

Intubated for months

His asthma got worse, and he still has not gotten back his taste

Lingering loss of taste

One person died

They died

Side effects

Death

They were very tired and moody, sleeps all day, no appetite

They passed away

Death

Death

They still have breathing problems and smell and taste problems

Multiple organ failure and septicemia

Breathing issues hospitalized

Unable to taste and smell

Loss of smell and taste

Death

They died

Died

Friend with a breathing problem

She has experienced weakness throughout her body.

Lack of oxygen. Blood clots in lungs.

Breathing issues, aches and pains

Cough and sore throat

Was hospitalized with pneumonia, made full recovery

Shortness of breath

Slow brain

Very sick

Lungs will never fully recover

Got sick and passed

Lot of cough trouble breath

My 90-year old grandma was in a nursing home and contracted it and died in May 2020.

This is a male approx. 55 years of age, good health, Caucasian male 170lbs. Normal diet good shape, fatigue, moisture in lungs almost like pneumonia symptoms.

Sick feeling

They had lack of smell and taste

They died

My younger brother had a hard time breathing and tasting after Covid 19

My friend has never gotten her taste back or it hasn’t been the same since she tested positive for Covid. Covid wiped out the few people I had left.

Limited physical activity due to breathing issues

Kidney problems

My mother-in-law is a long hauler and now is experiencing pulmonary issues

My mother she had a brain bleed after she got over Covid.

Joints not working correctly. Not being able to walk correctly.

They are still having trouble with being able to do activities and breathe like they use to normally

Pneumonia

Pneumonia, coughing, trouble breathing

Nausea and headache

Dead

My auntie died

Started having real bad chest problems

Ongoing lung and breathing conditions.

They caught cancer after getting Covid.

21-year old had heart attack

Vomiting

Hard to breathe. Lungs gave out and was laid to rest.

Breathing issues

He died

Thick and heavy blood

They died.

Lost taste and smell and died.

A lot of coughing and chest pains

Heart issues, long term fatigue

They now have a harder time breathing.

Loss of taste smell and high fever

Heart problems

Loss of taste even after getting better

They were coughing a lot and had a fever and chills

Issues with breathing

Chest pain. Sinus pain. Loss of taste. Some numbness and tingling in extremities

Not good asthma

They died

They had headaches, couldn’t smell and taste

Health deteriorating

Death

They passed away from it. They caught pneumonia whilst in the hospital with covid

The hospital let her leave early and her lungs collapsed

Breathing issues

Hospitalized in ICU for 14 days.

Headache and fever

They died

My son only had no smell or taste and a little achy

Very high fever always needing to puke and can't smell anything

One of the people was told she had it and she never fully recovered but she is a heavy smoker and she thinks it so much it makes her sick

They had mild symptoms they had fever, cough, and loss of taste

Lung problems

Ended up with compartment syndrome in his legs.

Breathing problems since having Covid

Enlarged heart

Breathing problems

Coughing

Breathing problems

Breathing issues

Breathing difficulties, fatigue

Drained energy, breathing difficulties, cloudy thinking

They provide best service in short period of time

They were sick

They were sick as hell

Fever, headache

He was a diabetic was completely vaccinated and caught covid and it destroyed his kidneys he now needs dialysis.

Ventilator

She was on a ventilator

Chest congestion breathing problems weak, no taste, ill feeling

Everyone I knew that had it has passed away from COVID

Heart problems blood clots

Lung pain can no long breath deep or hold her breath in. She now has asthma symptoms.

Chills, slight fever, cough, runny nose.

Trouble breathing, COPD, headaches, neurological issues

Continuous headaches and shortness of breath

Lung damage that led to death

Heart issues

Uncontrollable shaking and the sense of smell was off still

Pneumonia

Harder to breathe no energy feverish

Breathing bad and can't breathe

Olfactory loss

Never got taste back

Fever

Mainly breathing issues

They died

Death

My son's grandfather

Sore throat, loss of taste and smell

Continued exhaustion, memory issues, lung concerns

Lung disease.

Hospitalization for weeks.

He has been in hospital since 8/5. On ventilator since 8/22. Worst complication was CO2 retention, and doc says it's a miracle he survived. Has lost a devastating amount of muscle mass and has significant lung damage, but all else fine. Is now working to get off ventilator and expected home in a week to continue respiratory and physical therapy.

Trouble breathing and oxygen levels are down

They all had the vaccine

Kidney Failure

Extended amount of time of weakness and being tired.

Felt sick breathing problems

Constant fatigue

My sister had covid 19, but she was not vaccinated. Also, her husband had the virus and he was in the hospital for 4 days

Fever persisting, cough, fatigue

In the hospital for two weeks

Intestinal cramps, diarrhea, constipation

They were just sick and had a cough

They have respiratory problems now.

Sick congested chest coughing fevers

Mom had flu like symptoms after 1st dose

Stopped being active was always hurting

Sick cough sneezes no taste

Trouble breathing and fever

He passed away

Long term respiratory

Just a little sick

Unable to breathe fever

Humira

Extreme fatigue and constant brain fog

Can’t breathe the same

Brain fog, not as strong, tired

He has asthma and since covid his asthma is much worse

Kidney failure and depression and stomach issues

Lungs collapsed and heart gave out

Painful

My cousin continues to feel a tightness in her chest that will not go away

This person has multiple issues that they’re not being told is related to Covid but they didn’t have these issues before having Covid. They have issues with equilibrium, diarrhea, and sleep issues.

Death

Death

Difficult breathing

Changes in taste and smell, breathing problems.

Slowly recovering from the virus.

Blood clots

Pneumonia

Fever, coughing fatigue no appetite

Death

Still no taste and lung problems almost a year later

They died

Post covid bronchitis

Chest pain fever

That person went through hot flashes, couldn’t eat, couldn’t breathe, smell or even taste. Their body was very sore they were kind of bed bound.

My aunt had covid and passed

Flu symptoms

My mother. She passed away

They were really congested couldn’t breathe couldn’t smell couldn’t eat couldn’t swallow their throat was swell

They lost their sense of smell and taste

Extreme fatigue oxygen machine now.

Memory loss

They passed away.

They have asthma and it was controlled by use of 1 inhaler before they had covid 19. Now they have to use at least 3 different inhalers as well as several times a day breathing treatments and have developed heart issues from so many inhalers.

Critical condition in ice for several months. The family was called in and told he had less than an hour to live. They removed all life support and them a miracle happened he started to recover and was able to leave the hospital a couple of weeks later and was home within two months

Some friends actually died from Covid 19

Had two people die of heartbreak

They still have a little loss of taste and smell

Sickly, I just let them be at that point.

My father has not been able to walk or eat good after getting covid. He also got the covid shot and got sick 2 days after

He ended up in the hospital on a respirator because his oxygen levels where someone they didn't think he was going to live

They began to have a weakened immune system as well as a weak body

She was always shivering even if the heater was on and she was in front of a fire, lots of sniffles and runny noses, loss of taste and smell

The person had severe symptoms and was hospitalized on a ventilator for three weeks. In the middle of his stay, the condition was so severe that arrangements were made for his death.

He had a stroke and had to be on a ventilator he was not able to come back to work

My cousin got Covid and then passed away

My fiancé was hospitalized with Covid-19

Can’t smell, or taste

Difficulty breathing

Can't taste anything

They person had asthma, so it affected them way more

He had bacterial pneumonia and covid. He passed away yesterday @ the age of 51.

They had a fever

She is having liver problems

My Pap died.

Dizziness, headache, high fever

Severe flu symptoms. Still exhausted.

Never got their senses back and have chest problems now

That person had asthma and passed

Had trouble breathing right

Sick

The basic stuff but they had prior health issues

They were okay, just coughing fever and a lot of sweating

They were in the hospital for over a week

Can’t taste or smell

Cannot smell

They had loss of taste

The COVID health was very serious they almost died in the hospital

Flu like symptoms

They had trouble breathing and had no sense of smell or taste

Symptoms of shortness of breath and fever

It basically destroyed his lungs. He’ll never work again.

Lack of stamina. Loss of smell and taste.

They said that it was bad and they wouldn’t want to go through it again, shortness of breath and stuff like that it was awful

Fever sore

They both died

Hospitalized

Not being able to taste anything but chemicals when she eats.

Really difficult to breathe

Always having a headache

They were in the hospital and breathing problems

**Supplementary Material 3: Reported COVID-19 Inoculation Deaths and Injuries in Social Circles***


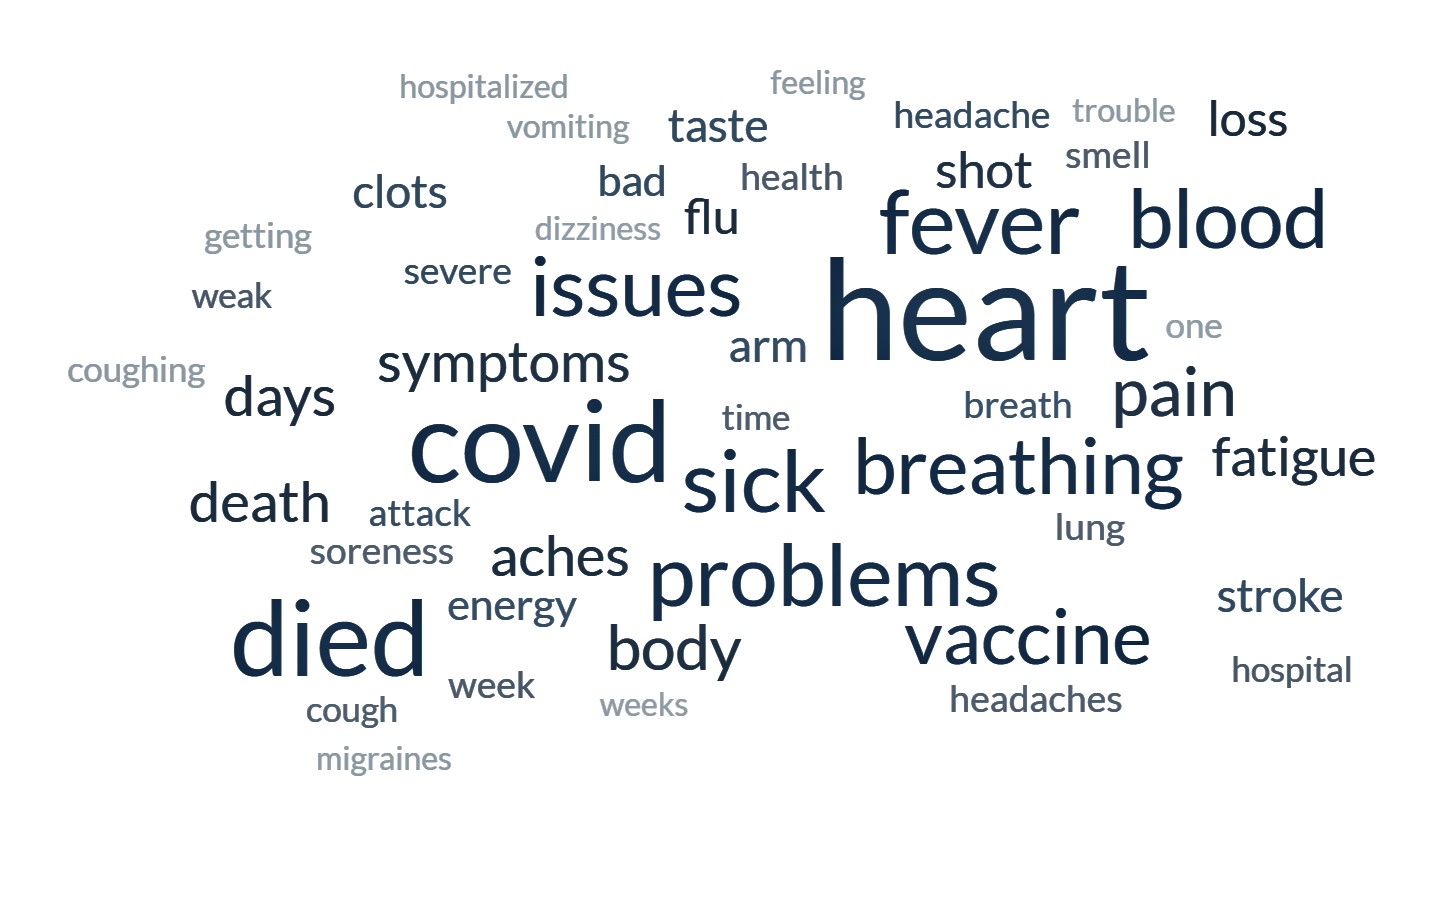


**Comments Provided by Respondents for the Following Question: Of the people you know who experienced a health problem after being vaccinated, think about the one you know BEST. Please describe the health condition experienced by that person.**

**These comments are intended to be provided as a separate linked document in the final published article.**

Severe body aches

Heart issues requiring surgery

Our daughter, her whole body shut down after 2nd shot. If her brother were not there she would not have survived

Chills, feeling rough, body aches, no energy, no appetite, weak.

Acute inflammation

High blood pressure.

She died don't know the health issues she had from it

Memory loss

Heart attack when he had no heart problems at all before it. He died from the heart attack.

For the day felt like he had a strong flu

COVID

Heart problems

Got a stroke

My coworker has had to go on disability because she started experiencing continuous migraines the day after receiving the vaccine. She had never had one before.

Headache, cough

Fatigue

They got COVID

Still caught covid and got sick

Covid like symptoms shortness of breath fever body aches, etc.

Comatose after heart attack

Stroke, more heart issues, blood clots,

She had a stroke.

Death

The person got a long rash on her leg that does not go away it looks like shingles but it from the covid vaccine she had introduce in her

Close to hospitalization

My little cousin had Coronavirus

Had to be admitted into the hospital for treatment. Had a temperature and inability to build up oxygen levels until put onto the hospital oxygen system

Sick and lethargic

Arthritis, blood disorder, acne, and heart burn

Died

Fatigue and general malaise

Pain

Lung problem

Covid pneumonia sepsis after booster

Fever chills

Poor energy, achiness

Higher blood pressure, higher pulse, and vertigo.

I guess know they caught COVID-19 again and this time it had them down bad sick

They were vomiting terribly and had awful fever

Heart problems

Fever

Sleepiness, loss of appetite

He died from the shot

Blood clots, circulation problems

They had experienced a blood clot reaction with the third dose.

Fatigue and breathing issues

My grandma's heart stopped 2 days after she got the vaccine.

Flu-like

Breathing problems

Severe symptoms after both shots. Sick for 4 days each time.

Extreme side effects

Hair loss, migraine

Weakened immune system

Cancer retuned in his body spread all over. Died!

They passed away from covid

Decreased lung capacity

Fatigue and 2 of them caught covid within a month of vaccination

Sore muscles

Just like a flu

Stomachache, nausea, fatigue, loss of appetite, loss of smell

Pain arm

Having seizures

Breathing

Lung problems

They got autism

Troubled breathing

My sister started having heavy periods after each covid vaccine

Sepsis

Their arm was sore

Coughing and headaches

Blood clots

Had a shingles like rash all over her face, on both sides not just one. This happened March 2021. The doctors said it was in fact from the vaccine, and to this day it hasn’t been cured. Mind you, she only took the vaccine to return to in person work. She didn’t want to, other than that.

Heart palpitations

Heart issues

Their pre-existing condition was triggered by the vaccine.

Death

This person’s health is going downhill since the shot.

They were in poor health

The only health condition experience was my arm was kind of swollen.

Died

Respiratory

She had a stroke within days of # 2 Moderna vaccine. She has to use a walker and has speech issues. She was in her 40’s. She is a registered nurse.

Hospitalized for three days with breathing and heart issues. He was required to take the shot to participate in the college world series.

Got Covid but only sniffles & cough

Shortness of breath

Alzheimer’s

My friend with no preexisting heart condition died of a heart failure after the second dose.

One was sick in bed a week delirious and unable to get up eat or anything (90). The other had vaccine and that evening experienced chest pain went to ER died with "stroke" (42)

Severe heart issues. 1 hour after injection my 22-year old friend had a massive heart attack and has been hospitalized for 7 months. Was very healthy and athletic before that shot

Heart issues

Heart issues

Blood clotting causing loss of limb

Death

On several medications she didn't take before for heart and breathing problems

COVID-19

They were sick for over 2 months. Weak, could not hardly breathe.

They had headaches

Heart problems

Fever and cough.

Craps

Aching, soreness

They all experienced it before the vaccines had been available.

Breathing issues are the hardest to cope with

Shaking, muscle spasms, and headache

I don't know a lot of details, but fever, achy feeling and dizziness were mentioned as well as sluggishness. Fortunately, none were hospitalized

Arm in pain 3 days

Swollen arms

Memory loss

Contracted cov19 after the vaccine

Body aches running nose loss of appetite

Temporary psychosis that required sedation at a mental hospital.

The shot made it worse. The lose energy and the end result was death. The shot doesn't work if it did then people would not be able to get covid.

The vaccine made them sick for a few months and even after getting better they were still kind of sick

Throwing up. Fever. Headache

Migraine and dizziness

They had nerve problems in their legs and they were weak

Migraines that never seem to go away when they almost never had one before.

Just pain: muscle pain

After getting the vaccine they started having seizures about 2 months after receiving the vaccine and never had any problems until they received the vaccine

They were bed ridden for a week with the biggest problem trying to breath with extreme fatigue

Her immune system attacked her kidneys

Fever chills aches for about 24 hours

Catches

Health problems

They died

Significant pain that was not there before

Blood clots

My great grandmother got sick after she got the shot

Skin issues

Nausea, headache

Felt like they had fever and their arm was very sore.

Pain and swelling in the arm that was injected. Also stomach pains

He had chest problems hard for him to breath and he seems his other skills are slower

Death

My daughter was ill enough to be bedridden after the first and second Moderna vaccine. It only lasted about 12 hours though.

Hospitalized and on a ventilator for 3 days.

In hospital but was out in 3 weeks

They had dizziness. Trouble with vision

Got COVID 19 and had to be hospitalized

Vomiting steady soreness

Got really sick and all most died because it is poison

They had headaches felt feverish their injection was swollen

Experience more body aches

Redness, soreness, lymphadenopathy, myalgias, fever, and headache within hours of getting booster.

Health, confusion is really bad

Getting COVID

Nausea. Heart issues high bp hard to move around

Trouble breathing

They just had a very bad flu like cold

A member of my church died from blood clot surgery less than a week after having a covid vaccine in the hospital during recovery

Vomiting, dizziness, ringing in ears for approximately 3 months

Flu like symptoms and a severe cold

They almost died

They received the vaccine and after they immediately started having health issues with headaches and shortness of breath and their immune system was compromised.

Cousin 47-stroke Cousin- blood clots Friend-death Aunt- death

Loss of taste

Both people got Covid shortly after receiving vaccine.

He died after 5 weeks, he was a diabetic and his kidneys shut down after getting COVID 15 days after vaccine

Two of our children, both nurses, suffered intense flu like symptoms

Heart problems

Got the vaccine shot and it went against the body n he’s died

Death

They experienced a mild heart attack

Bruising and lung

Numbness on side of injection

They couldn't breathe for a minute and was rushed to the hospital

Blood clot

They got covid

Two months of dizziness, vertigo, anxiety, terrible sleep

Death from a heart attack after vaccination by a few weeks.

Lack of taste

Coughing fever

It was severe but so far cannot tell if it’s lasting or not.

ICU. Then a deceased.

Ill

The same person experienced fever and extreme fatigue.

Issues with their heart

Died

No taste or small and some breathing problems

Felt like a case of the flu

Heart attack

Death

Difficulty breaking, constant coughing and trouble and breathing with fever

Soreness, short of breath, fever, body aches

Close friend began having cardiac issues after vaccination.

Anaphylactic shock twice. Nearly killed my mother.

Neurological damage and a spontaneous pneumothorax

Death

Death

Weakens immune system

Stiff neck and sickness flu symptoms and time off work and school

Hemoratic stroke

Not good for health

Sore and body aches

Flu symptoms for up to a full week

It made them really light-headed and passed out

Blood clots.

They started to hemorrhage and almost lost baby

Heart conditions

My father, low energy and a significant change in his health declining. Still has a rough time breathing and now uses a cpap machine.

Went to hospital with pneumonia then blood clots in legs, can walk but not far and weak.

Death

Only vaccine side effects

Scary

My cousin had an allergic reaction to the shot

My brother because he was allergic

Menstrual cycles off drastically, memory loss, post-nasal drip, prone to sinus infections

It was bad, sad and I was so sad for her

They began to have extreme head aches and stomach aches. They were extremely drowsy and weak.

Could not taste or smell things

Depression, anxiety

Loss of limbs due to receiving the original covid Vaccine...

Trouble breathing

Couldn't taste

My mother’s back started hurting and now she has on again off again back problems and she’s young she’s in her late 30s.

They died

Spots on their face and body weakness

They got sick and got covid directly after getting the vaccine.

They still can’t walk without catching their breath

Migraines

Asthma

No illness, just bad coughing

Neurological issues

They was sick for a couple of days with a swollen arm

Joint paint for months

Breathing and constant pain in arm. Constantly getting migraines

Heart and lung issues

Headaches or feeling nauseous

Horrible

They got covid 19

Throwing up

Seizure, hospitalization, life has been altered. Partially paralyzed

Myocarditis

My uncle had lung problems

They were quite gassy

They went into a cardiac arrest and passed away

Very sick

Never got over covid

They had flu like symptoms- fever, nausea, diarrhea. Pain at injection site. Tiredness. Headache

Paralyzed, waist down

She had gotten cold quicker and for three days a runny nose.

Bad breathing

Tired

Long hauler

They had the worst week/month I felt bad for them

Mini stroke

Heart palpitations Tachycardia

Illness

I know nothing more than that of the scaling skin condition

He was as ill for about 10 days

Soreness

It was horrible

Headaches, stomach pain, arms sore

Paralyzed him

It affected their energy and breathing even after they supposedly got better.

Flu like symptoms

They experience body aches, fever severe headaches low energy

Sick

The mother of friend she was vaccinated and the next day she died

She lost her baby

Very bad and sick

His heart was hearting

Healthy

Coughs

Died

One died, one had a heart attack and one had a blood clot

She had migraines and confusion about everyday things like time, if she did something she was supposed to or forgot about it…she still has confusion at times

Extreme fatigue, fever, body aches and pains, respiratory issues

Body aches, no smell or taste

Lung problems or sinuses problem as a detect result of weather changes

Developed COVID-19 sometime after receiving the vaccine

Hospitalized for a week

Death with organ failure

They got covid after taking the vaccine and have had ongoing symptoms

They died

They died

Side effects

Dizziness—vision problems

The person I know vomited and had serious migraines for about a week after both the second and third doses. Mild temperature of about 100.1

Death

She can no longer smell

Chills and fever and lots of pain

Had an allergic reaction.

Bell’s palsy

Sick

Severe cough and hard to breath

Teenagers developed heart problems

Aches and pains as well as lung issues

They had some reactions

Cough trouble breathing

The lack of smell and taste

Not being able to breathe and being extremely sick overall.

They died

Had flu like symptoms for weeks

Lack of energy, and general feeling of something wasn't right

Horrible they died

The person had really bad heart problems

Swollen legs

No vomiting

Elevated heart issues, high blood pressure, previous conditions come back, death.

Throat closed

It was horrible

Numbness in parts of body

A lot of coughing and chest pains

They said they felt weaker and less efficient in working on things

Died from covid

Struggling to get up after you been vaccinated

Breathing problems

Died

Breathe problem

She has not felt the same as she did before the shot. She has most days now not feeling good and don’t have as much energy as she had before.

They died.

They were sick a very long time. They found out they had an allergic reaction

Pneumonia, dehydration

Blood pressure issues and kidney issues and more issues

Caught pneumonia

They were sick for several days with flu like symptoms

No fever, sniffles, or coughing before the shot. Multiple symptoms after.

Chronic headache

Cough

Ended up dying from a reaction to the drug which caused a major heart attack

Experience soreness and pain and fatigue along with migraines for at least three days and she had to rest and was exhausted drained of energy could not continue her door dash delivery

They got pneumonia after the first shot. They got well and got the second shot and got pneumonia again and died.

Enlarged heart

Their asthma got worse. More sinus infections

Enlarged heart

Headaches

Got sick day after shot. Was in coma. Breathing difficulties, racing heart, fatigue

Died

Rash and a case of hives.

Fever

They lost their sense of smell and taste. Also know someone who got extremely sick after receiving the vaccine and they had to be hospitalized.

Hard time breathing

Tired and sleepy after shot

Blood clots

Heart problems breathing problems

One of them lost her life. The other got sick and got over then got sick 2 times after.

She got the Moderna Vaccine, and it gave her COVID-like symptoms for 3 or 4 days before it went away.

Chest pain with cough, sinus problems, Fatigue, sleepy more than 12 hrs a day, body cramps, weak muscles, headache, fever, sores in mouth and throat. Bruised easily. Major body aches and pain, stiffness.

Developed covid and died

They ran a fever. Shaking uncontrollably and jerking. Vomiting and soreness in muscles. Aches and pains

Individual experienced a mild stroke from excessive blood clotting

Heart palpitations

They ended up getting covid right after the vaccinations and lost their sense of taste

The felt weak and fatigue for days and the heartbeat was fast

Got covid

Mostly flu like symptoms and fatigue

Blood clots and suffered a stroke

Harder to breathe, have no energy feverish

Just sick for 2 weeks

Died

Heart condition. New conditions never had previous issues. One passed away

Heart failure

They got it really bad

Soreness, problems breathing sleepiness, etc.

She had shivers after the vaccine

Rash heart problems breathing problem

Had a stroke 3 weeks later

Weak, delirious

Fatigue and headaches

Had a massive heart attack.

They developed covid

Blood clots and heart problems

Blood clots

Chills

High blood pressure seizures

Made us all super sick for days.

We're hospitalized with various issues

Fever

Can’t eat certain things

Vision and death

Depression digestion severe fatigue and asthma

Painful

Drug reaction from change in prescription.

High fever, weakness

High fever, coughing

Blood clots

Soreness in arm, vomiting

He did have the virus he through, he was coughing

Lung and nervous system shut down

Fever and chest pain

All standard covid symptoms

Died

Lost their taste of smell and taste

Their health dropped drastically, and they are still not better.

Heart problems & having to be on a heart monitor for a week.

Headaches.

She got covid and ended up in the hospital for 4 days.

He contracted covid 3 times after his vacations and still experiences major body pain and weakness

My sister had to be rushed to the emergency room

They got sick with all symptoms of COVID 19 eventually recovered

After getting the shot he got sick with covid. He can't walk without assistance.

They have covid

He can still feel the injection in his arm and once in a while his arm goes completely numb. He also gets rapid beating heart beats off and on throughout the week that he has never had before

Whooping cough

Stroke

Severe vomiting, diarrhea, and dizziness

They were sore for about 2 weeks and couldn’t move after lying down for a long time.

Chills and fever

Aching all over

Loss of taste, smell

Extremely sick for almost a month. Caught covid real bad. Has breathing problems and got put on a machine

Breathing trouble and ventilator

COVID 19

Heart

Pain and swelling in arm

Loss of sense of smell

The health was having trouble breathing

Energy

Within after hours of being vaccinations, she became super sick fever etc. It took her days to stop feeling like pneumonia was not in her lungs.

Bell’s palsy

Made them very tired and weak

Smallpox

My mom passed two weeks after receiving the vaccine. (This event was originally reported under the lasting COVID-19 illness issues.)
